# Supplementary material for: Hydrazine Oxidation in Aqueous Solutions I. N4H4 Decomposition
Source: Preprints.org preprint supplement (doi:10.20944/preprints202407.0102.v1), 2024-07-01
Supplement: Supplementary file 1 [file supplementary]

## Hydrazine Oxidation in Aqueous Solutions II. N<sub>4</sub>H<sub>4</sub> Decomposition

Martin Breza and Anton Gatiaľ

Dept. Physical Chemistry, Slovak Technical University, Radlinskeho 9, SK-81237 Bratislava, Slovakia

### Supplementary information

**Figure S1.** Molecular graphs of optimized N<sub>4</sub>H<sub>4</sub> structures in *anti*-conformation (N – blue, H – gray, bond critical points – red).

**Figure S2.** Molecular graphs of optimized N<sub>4</sub>H<sub>4</sub> structures in *syn*-conformation (N – blue, H – gray, bond critical points – red, ring critical points - yellow).

**Figure S3.** Molecular graphs of optimized cyclo-N<sub>4</sub>H<sub>4</sub> structures (N – blue, H – gray, bond critical points – red, ring critical points - yellow).

**Figure S4.** Molecular graphs of optimized N<sub>4</sub>H<sub>4</sub> structures after N – N bond fission (N – blue, H – gray, bond critical points – red, ring critical points - yellow).

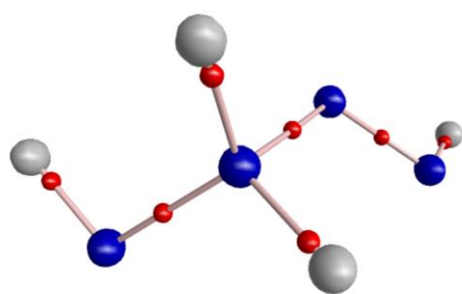

**A1201**

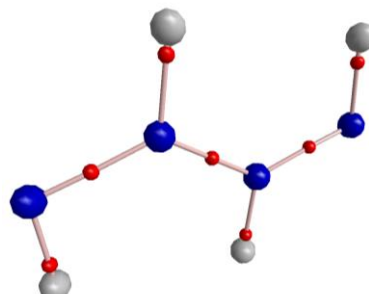

**A1111**

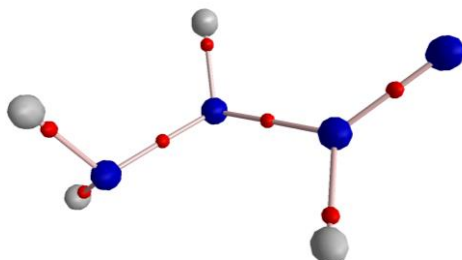

**A2110**

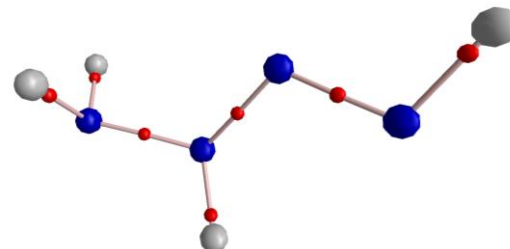

**A2101**

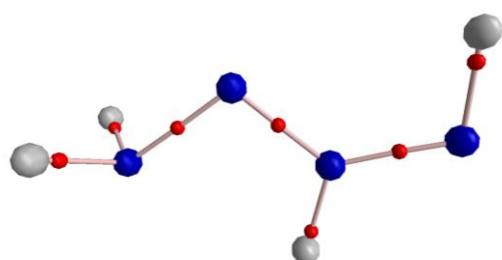

**A2011**

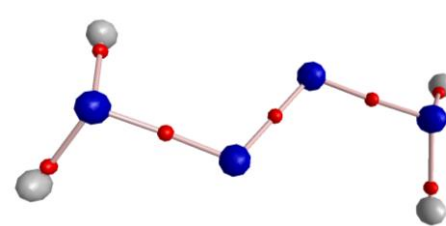

**A2002**

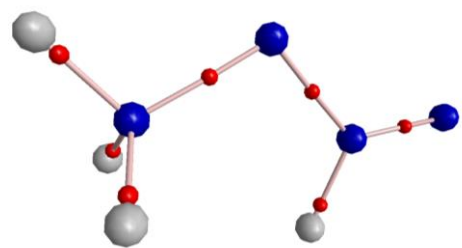

**A3010**

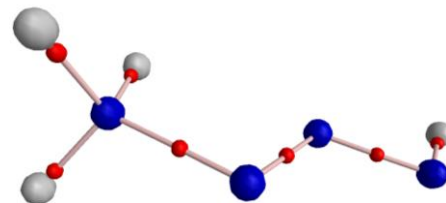

**A3001**

**Figure S1.** Molecular graphs of optimized  $\text{N}_4\text{H}_4$  structures in *anti*-conformation (N – blue, H – gray, bond critical points – red).

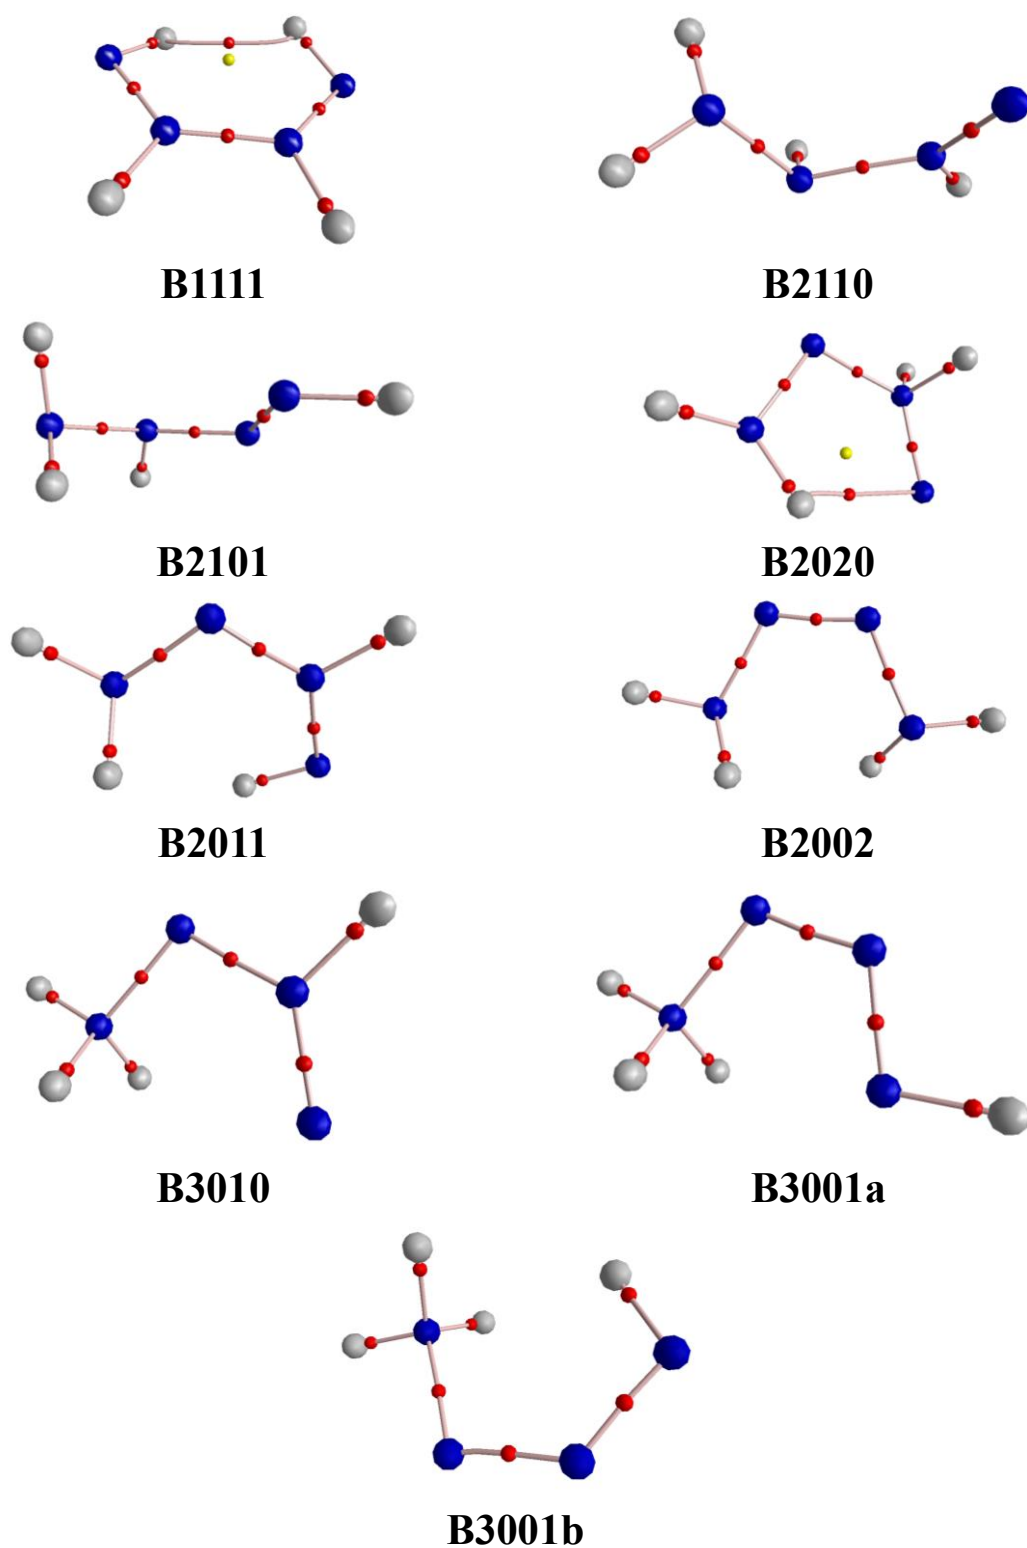

**Figure S2.** Molecular graphs of optimized  $\text{N}_4\text{H}_4$  structures in *syn*-conformation (N – blue, H – gray, bond critical points – red, ring critical points - yellow).

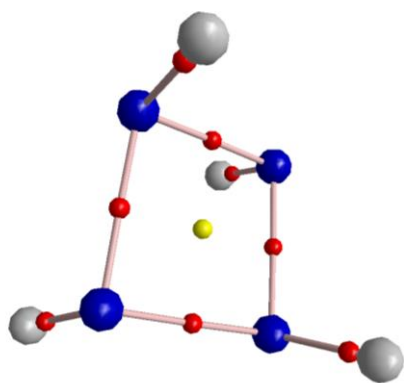

**C1111**

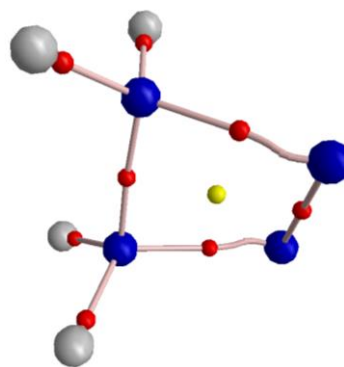

**C2200**

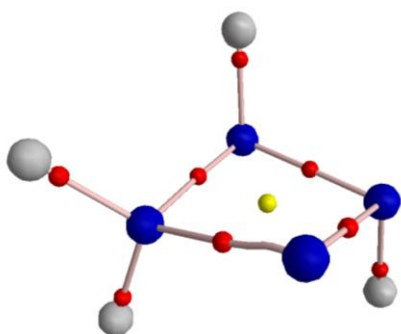

**C2110**

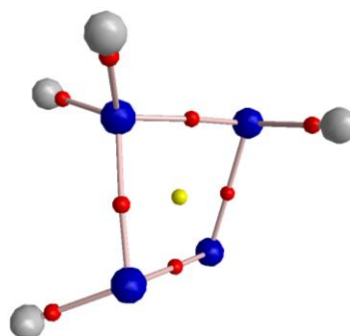

**C2101**

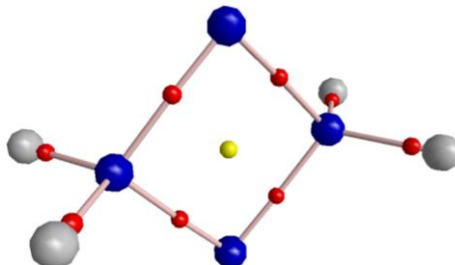

**C2020**

**Figure S3.** Molecular graphs of optimized cyclo- $\text{N}_4\text{H}_4$  structures (N – blue, H – gray, bond critical points – red, ring critical points – yellow).

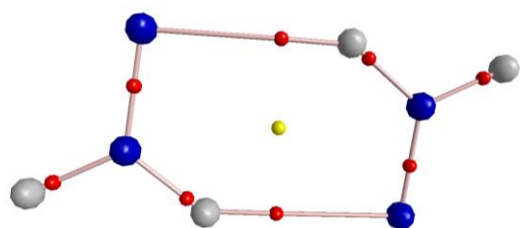

**D(02)(20)**

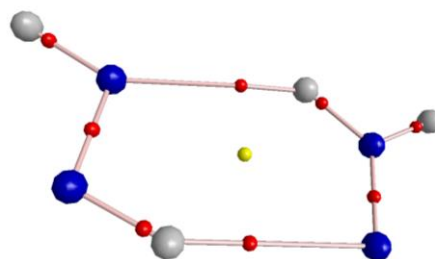

**D(11)(20)a**

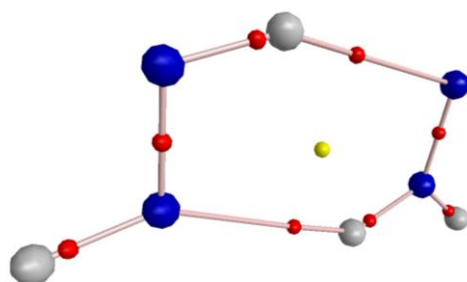

**D(11)(20)b**

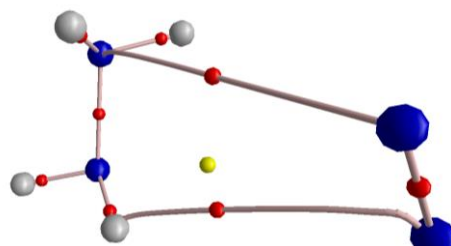

**D(22)(00)a**

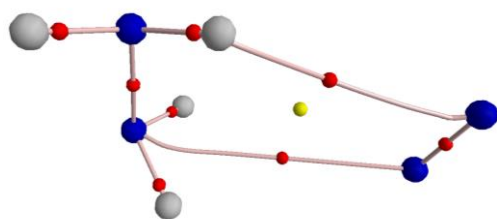

**D(22)(00)b**

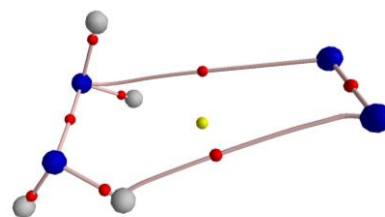

**D(22)(00)c**

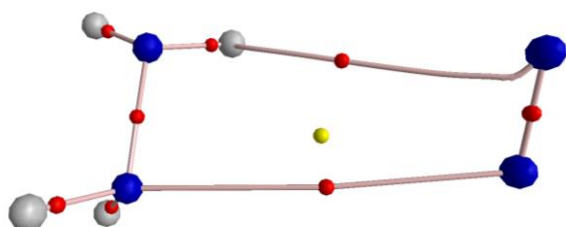

**D(22)(00)d**

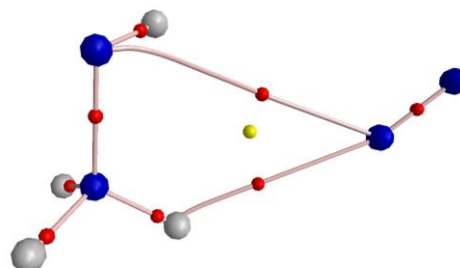

**D(31)(00)a**

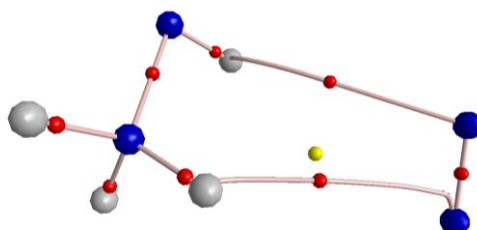

**D(31)(00)b**

**Figure S4.** Molecular graphs of optimized  $N_4H_4$  structures after N – N bond fission (N – blue, H – gray, bond critical points – red, ring critical points - yellow).
